# Supplementary material
Source: ML conference proceedings conference paper supplement (https://openaccess.thecvf.com/content/ICCV2025/html/Li_Learning_Hierarchical_Line_ICCV_2025_paper.html)
Supplement: Supplementary file 1 [file Li_Learning_Hierarchical_Line_ICCV_2025_supplemental.pdf]

# Learning Hierarchical Line Buffer for Image Processing

## Supplementary Document

Jiacheng Li   Feiran Li   Daisuke Iso  
Sony Research

### 1. Additional Results

#### 1.1. Additional Quantitative Results

**RAW denoising.** Table 1 and Table 2 present the SSIM [17] and LPIPS [22] results for raw image denoising. As shown in Table 2, our method demonstrates perceptual quality improvements consistent with the findings in terms of fidelity, further confirming its effectiveness.

**Gaussian denoising.** Table 3 provides results for grayscale image denoising under the Gaussian noise assumption. Our method outperforms the previous local DNN-based method, LineDL [10], highlighting its superior performance.

**Super-Resolution.** Table 4 and Table 5 report the PSNR and SSIM [17] results for  $\times 2$  and  $\times 3$  image upscaling factors, respectively.

#### 1.2. Additional Qualitative Results

In Fig. 1 and Fig. 2, we provide more visual results on RAW and Gaussian grayscale image denoising, respectively.

### 2. More Implementation Details

**Network architecture.** Our model employs three blocks for both the intra-line encoder and decoder. The base channel dimensions for  $x_t$ ,  $h_t$ , and  $c_t$  are set to 64. In each stage of the intra-line block, one-quarter of the channels are allocated for expanding strip convolutions with kernel sizes of  $1 \times 5$ ,  $1 \times 7$ , and  $1 \times 9$ , respectively. Convolutional layers within the intra-line block are followed by LeakyReLU activation functions, and skip connections are incorporated between blocks. In the inter-line processing module, all convolutional layers utilize a  $3 \times 3$  kernel. Since the public implementation of LineDL is not available, we reimplemented the method and fully trained it based on the official settings.

**Training details.** We train our model using the Adam optimizer [12] with a cosine annealing learning rate schedule [14]. For RAW image denoising, the model is trained for 1000 epochs with a batch size of 1 and a patch size of  $512 \times 512$ . For Gaussian image denoising and super-resolution tasks, training is conducted for  $2 \times 10^5$  iterations with a batch size of 16 and a patch size of  $128 \times 128$ . For

line grouping, an overlap ratio of  $\frac{1}{2}$  is applied between adjacent groups, with the final result obtained by averaging the overlapping regions.

**Efficiency evaluation.** The shared memory demand in local methods depends on the shape, particularly the channel dimensions, of the hidden and cell states in both LineDL and our method. The memory demand reported for LineDL [10] considers only the largest feature tensor. In contrast, our evaluation utilizes the official PyTorch profiling tool (`torch.profiler.ProfilerActivity.CUDA`) and also reports the shared memory usage for hidden state features.

### 3. Additional Discussion

**The classification of DNNs.** Although certain deep neural networks (DNNs), particularly convolutional neural networks (CNNs), can operate in local regions, we categorize them as global methods due to their receptive fields (RF) often extending beyond the height of a single line group. For example, the RF of FSRCNN is  $17 \times 17$ , and that of UNet is about  $106 \times 106$ . This characteristic makes them unsuitable for line-buffer-based processing.

**Running time.** Since we simulate line buffers on a GPU by manually controlling data transfers with a for-loop for a comprehensive comparison with global DNNs, the advantage in latency of local DNNs cannot be enjoyed by the current implementation. The targeted streaming scenario is intrinsically suited for data fragmentation and incurs no extra runtime at the algorithm level. Image sensors naturally output data line-by-line, and our method is designed to operate as soon as sufficient lines are available, avoiding to wait for the full image to load and thus benefiting end-to-end latency. Nevertheless, we give examples of the running time here. Specifically, for denoising a  $1920 \times 1080$  HD image, the running time of DnNN [20] is  $101.78\mu s$ , while the baseline, LineDL, and our method takes  $155.25\mu s$ ,  $558.90\mu s$ , and  $183.60\mu s$ , respectively, under the assumption of non-overlap line groups with  $l = 8$ . For upsampling a  $480 \times 320$  image to HD resolution ( $1920 \times 1080$ ), the running time of a typical lightweight DNN, CARN [1] is  $24.05\mu s$ , while the baseline, LineDL, and our method takes  $22.88\mu s$ ,  $88.80\mu s$ , and  $40.80\mu s$ , respectively.

| Type                | Method                    | ELD           |               | SID           |               |               | Mem. Req. |                     |        |
|---------------------|---------------------------|---------------|---------------|---------------|---------------|---------------|-----------|---------------------|--------|
|                     |                           | $\times 100$  | $\times 200$  | $\times 100$  | $\times 250$  | $\times 300$  | Param.    | Peak <sub>UHD</sub> |        |
| Global<br>(Classic) | NLM [3]                   | 0.8420        | 0.7496        | 0.8477        | 0.7045        | 0.6004        | -         | -                   |        |
|                     | BM3D [7]                  | 0.8463        | 0.7552        | 0.8623        | 0.7285        | 0.6287        | -         | -                   |        |
| Global<br>(DNNs)    | DnCNN [20]                | 0.7302        | 0.6387        | 0.5794        | 0.4540        | 0.3899        | 2.24MB    | 3.96GB              |        |
|                     | UNet [4]                  | 0.9700        | 0.9197        | 0.9487        | 0.9345        | 0.9198        | 31.04MB   | 1.39GB              |        |
|                     | DRUNet [21]               | 0.9737        | 0.9520        | 0.9515        | 0.9305        | 0.9109        | 130.57MB  | 1.98GB              |        |
|                     | NAFNet [5]                | 0.9768        | 0.9477        | 0.9517        | 0.9261        | 0.8994        | 116.63MB  | 13.94GB             |        |
|                     | Restormer [19]            | 0.9776        | 0.9524        | 0.9524        | 0.9322        | 0.9118        | 104.51MB  | OOM                 |        |
| Local<br>(Classic)  | Median( $K = 3$ ) [15]    | 0.8073        | 0.6933        | 0.7338        | 0.5823        | 0.4820        | -         | 0.50MB              |        |
|                     | Median( $K = 5$ ) [15]    | 0.8332        | 0.7311        | 0.7917        | 0.6259        | 0.5240        | -         | 0.54MB              |        |
|                     | Median( $K = 7$ ) [15]    | 0.8366        | 0.7419        | 0.8204        | 0.6525        | 0.5499        | -         | 0.57MB              |        |
|                     | Wiener( $K = 5$ ) [2]     | 0.8460        | 0.7501        | 0.8195        | 0.6645        | 0.5592        | -         | 1.06MB              |        |
|                     | Wiener( $K = 7$ ) [2]     | 0.8468        | 0.7581        | 0.8432        | 0.6907        | 0.5827        | -         | 1.11MB              |        |
|                     | Bilateral( $K = 5$ ) [16] | 0.8423        | 0.7436        | 0.8108        | 0.6577        | 0.5557        | -         | 15.06MB             |        |
| Local<br>(DNNs)     | Baseline                  | 0.9272        | 0.8689        | 0.9257        | 0.8967        | 0.8724        | 6.65MB    | 15.0+               | 0MB    |
|                     | LineDL [10]               | 0.9595        | 0.9087        | 0.9444        | 0.9264        | 0.9092        | 24.36MB   | 15.0+120.0MB        |        |
|                     | Ours                      | <b>0.9624</b> | <b>0.9179</b> | <b>0.9453</b> | <b>0.9291</b> | <b>0.9120</b> | 3.37MB    | 8.0+                | 15.0MB |

Table 1. Quantitative results (SSIM) for RAW image denoising on the ELD dataset [18] and SID dataset [4]. The memory requirements are estimated assuming FP32 precision. Peak memory is reported in UHD ( $3840 \times 2160$ ) resolution, and the activation peak memory usage of local DNNs is reported in the format of “current pass + shared”. Local methods operate on a line group of 8, *i.e.*,  $l = 8$ . “OOM” denotes that out-of-memory error occurs on an NVIDIA H100 GPU with 80GB memory. The best results in local methods are **highlighted**.

| Type                | Method                    | ELD           |               | SID           |               |               | Mem. Req. |                     |        |
|---------------------|---------------------------|---------------|---------------|---------------|---------------|---------------|-----------|---------------------|--------|
|                     |                           | $\times 100$  | $\times 200$  | $\times 100$  | $\times 250$  | $\times 300$  | Param.    | Peak <sub>UHD</sub> |        |
| Global<br>(Classic) | NLM [3]                   | 0.1783        | 0.3462        | 0.1939        | 0.2812        | 0.3221        | -         | -                   |        |
|                     | BM3D [7]                  | 0.0616        | 0.1283        | 0.1108        | 0.1763        | 0.2219        | -         | -                   |        |
| Global<br>(DNNs)    | DnCNN [20]                | 0.2356        | 0.3810        | 0.3801        | 0.5171        | 0.5499        | 2.24MB    | 3.96GB              |        |
|                     | UNet [4]                  | 0.0350        | 0.0593        | 0.0730        | 0.1006        | 0.1250        | 31.04MB   | 1.39GB              |        |
|                     | DRUNet [21]               | 0.0322        | 0.0566        | 0.0705        | 0.1069        | 0.1363        | 130.57MB  | 1.98GB              |        |
|                     | NAFNet [5]                | 0.0347        | 0.0592        | 0.0666        | 0.0970        | 0.1252        | 116.63MB  | 13.94GB             |        |
|                     | Restormer [19]            | 0.0289        | 0.0484        | 0.0631        | 0.0955        | 0.1220        | 104.51MB  | OOM                 |        |
| Local<br>(Classic)  | Median( $K = 3$ ) [15]    | 0.2035        | 0.3382        | 0.2947        | 0.4436        | 0.4696        | -         | 0.50MB              |        |
|                     | Median( $K = 5$ ) [15]    | 0.1508        | 0.2688        | 0.2494        | 0.3769        | 0.4147        | -         | 0.54MB              |        |
|                     | Median( $K = 7$ ) [15]    | 0.1309        | 0.2124        | 0.2308        | 0.3425        | 0.3902        | -         | 0.57MB              |        |
|                     | Wiener( $K = 5$ ) [2]     | 0.1361        | 0.2408        | 0.2351        | 0.3375        | 0.3810        | -         | 1.06MB              |        |
|                     | Wiener( $K = 7$ ) [2]     | 0.1270        | 0.1895        | 0.2219        | 0.3112        | 0.3629        | -         | 1.11MB              |        |
|                     | Bilateral( $K = 5$ ) [16] | 0.1579        | 0.3050        | 0.2359        | 0.3559        | 0.3962        | -         | 15.06MB             |        |
| Local<br>(DNNs)     | Baseline                  | 0.0530        | 0.0892        | 0.1203        | 0.1823        | 0.2040        | 6.65MB    | 15.0+               | 0MB    |
|                     | LineDL [10]               | 0.0422        | 0.0693        | 0.0776        | 0.1153        | 0.1448        | 24.36MB   | 15.0+120.0MB        |        |
|                     | Ours                      | <b>0.0381</b> | <b>0.0647</b> | <b>0.0750</b> | <b>0.1115</b> | <b>0.1395</b> | 3.37MB    | 8.0+                | 15.0MB |

Table 2. Quantitative results (LPIPS) for RAW image denoising on the ELD dataset [18] and SID dataset [4]. Lower is better.

| Type                | Method                    | Set12        |              |              | BSD68        |              |              | Urban100     |              |              | Mem. Req. |                     |
|---------------------|---------------------------|--------------|--------------|--------------|--------------|--------------|--------------|--------------|--------------|--------------|-----------|---------------------|
|                     |                           | 15           | 25           | 50           | 15           | 25           | 50           | 15           | 25           | 50           | Param.    | Peak <sub>UHD</sub> |
| Global<br>(Classic) | NLM [3]                   | 31.19        | 28.50        | 24.79        | 30.06        | 27.49        | 24.47        | 30.79        | 27.64        | 23.41        | -         | -                   |
|                     | BM3D [7]                  | 32.39        | 29.99        | 26.75        | 31.15        | 28.63        | 25.70        | 32.36        | 29.74        | 26.07        | -         | -                   |
| Global<br>(DNNs)    | DnCNN [20]                | 32.86        | 30.44        | 27.18        | 31.73        | 29.23        | 26.23        | 32.64        | 29.95        | 26.26        | 2.24MB    | 3.96GB              |
|                     | DRUNet [4]                | 33.25        | 30.94        | 27.90        | 31.91        | 29.48        | 26.59        | 33.44        | 31.11        | 27.96        | 130.57MB  | 1.98GB              |
|                     | SwinIR [13]               | 33.36        | 31.01        | 27.91        | 31.97        | 29.50        | 26.58        | 33.70        | 31.30        | 27.98        | 47.58MB   | 50.31GB             |
|                     | Restormer [19]            | 33.42        | 31.08        | 28.00        | 31.96        | 29.52        | 26.62        | 33.79        | 31.46        | 28.29        | 104.51MB  | OOM                 |
|                     | HAT [6]                   | 33.49        | 31.13        | 28.07        | 31.99        | 29.52        | 26.60        | 33.99        | 31.67        | 28.62        | 83.09MB   | OOM                 |
| Local<br>(Classic)  | Median( $K = 3$ ) [15]    | 27.31        | 25.19        | 21.02        | 26.87        | 24.89        | 20.94        | 25.24        | 23.62        | 20.24        | -         | 0.50MB              |
|                     | Wiener( $K = 5$ ) [2]     | 27.78        | 26.44        | 23.29        | 27.34        | 26.12        | 23.13        | 25.89        | 24.50        | 21.92        | -         | 1.06MB              |
|                     | Bilateral( $K = 5$ ) [16] | 28.61        | 26.58        | 23.89        | 27.74        | 26.14        | 23.67        | 26.26        | 24.31        | 22.05        | -         | 15.06MB             |
| Local<br>(DNNs)     | Baseline                  | 32.24        | 29.62        | 26.10        | 31.28        | 28.65        | 25.51        | 31.94        | 28.99        | 25.00        | 6.65MB    | 15.0+ 0MB           |
|                     | LineDL [10]               | 32.46        | 29.97        | 26.72        | 31.42        | 28.90        | 25.90        | 32.10        | 29.36        | <b>25.78</b> | 24.36MB   | 15.0+120.0MB        |
|                     | Ours                      | <b>32.70</b> | <b>30.21</b> | <b>26.87</b> | <b>31.62</b> | <b>29.08</b> | <b>26.04</b> | <b>32.38</b> | <b>29.46</b> | 25.73        | 3.37MB    | 8.0+ 15.0MB         |

Table 3. Quantitative results (PSNR) for Gaussian grayscale image denoising on standard benchmark datasets.

| Type               | Method       | Set5         |               | Set14        |               | BSDS100      |               | Urban100     |               | Manga109     |               | Mem. Req. |                    |
|--------------------|--------------|--------------|---------------|--------------|---------------|--------------|---------------|--------------|---------------|--------------|---------------|-----------|--------------------|
|                    |              | PSNR         | SSIM          | Param.    | Peak <sub>HD</sub> |
| Global<br>(DNNs)   | FSRCNN [8]   | 37.05        | 0.9560        | 32.66        | 0.9090        | 31.53        | 0.8902        | 29.88        | 0.9020        | 36.67        | 0.9710        | 0.05MB    | 442.97MB           |
|                    | CARN [1]     | 37.76        | 0.9590        | 33.52        | 0.9166        | 32.09        | 0.8978        | 31.92        | 0.9256        | 38.36        | 0.9765        | 4.45MB    | 506.25MB           |
|                    | SwinIR [13]  | 38.14        | 0.9611        | 33.86        | 0.9206        | 32.31        | 0.9012        | 32.76        | 0.9340        | 39.12        | 0.9783        | 47.58MB   | 50.31GB            |
|                    | HAT [6]      | 38.73        | 0.9637        | 35.13        | 0.9282        | 32.69        | 0.9060        | 34.81        | 0.9489        | 40.71        | 0.9819        | 83.09MB   | OOM                |
|                    | MambIR [9]   | 38.57        | 0.9627        | 34.67        | 0.9261        | 32.58        | 0.9048        | 34.15        | 0.9446        | 40.28        | 0.9806        | 18.61MB   | 64.00GB            |
| Local<br>(Classic) | Nearest      | 30.82        | 0.8991        | 28.51        | 0.8446        | 28.39        | 0.8239        | 25.62        | 0.8199        | 28.12        | 0.9089        | -         | 0.96MB             |
|                    | Bilinear     | 32.12        | 0.9106        | 29.15        | 0.8384        | 28.65        | 0.8090        | 25.95        | 0.8077        | 29.13        | 0.9115        | -         | 0.96MB             |
|                    | Bicubic [11] | 33.63        | 0.9292        | 30.23        | 0.8681        | 29.53        | 0.8421        | 26.86        | 0.8394        | 30.78        | 0.9338        | -         | 0.96MB             |
| Local<br>(DNNs)    | Baseline     | 37.32        | 0.9573        | 33.03        | 0.9118        | 31.68        | 0.8927        | 30.87        | 0.9148        | 37.03        | 0.9727        | 6.67MB    | 8.5+ 0MB           |
|                    | LineDL [10]  | 37.59        | 0.9586        | 33.19        | 0.9138        | 31.84        | 0.8951        | 31.22        | 0.9189        | 37.44        | 0.9740        | 27.45MB   | 75.0+60.0MB        |
|                    | Ours         | <b>37.63</b> | <b>0.9589</b> | <b>33.32</b> | <b>0.9149</b> | <b>31.90</b> | <b>0.8960</b> | <b>31.43</b> | <b>0.9213</b> | <b>37.58</b> | <b>0.9746</b> | 3.39MB    | 3.8+ 7.5MB         |

Table 4. Quantitative results (PSNR and SSIM) for super-resolution ( $\times 2$ ) on the standard benchmark datasets. Peak memory is reported in upscaling HD ( $1920 \times 1080$ ) resolution with a factor of 4, assuming FP32 precision.

| Type               | Method       | Set5         |               | Set14        |               | BSDS100      |               | Urban100     |               | Manga109     |               | Mem. Req. |                    |
|--------------------|--------------|--------------|---------------|--------------|---------------|--------------|---------------|--------------|---------------|--------------|---------------|-----------|--------------------|
|                    |              | PSNR         | SSIM          | Param.    | Peak <sub>HD</sub> |
| Global<br>(DNNs)   | FSRCNN [8]   | 33.18        | 0.9140        | 29.37        | 0.8240        | 28.53        | 0.7910        | 26.43        | 0.8080        | 31.10        | 0.9210        | 0.05MB    | 442.97MB           |
|                    | CARN [1]     | 34.29        | 0.9255        | 30.29        | 0.8407        | 29.06        | 0.8034        | 28.06        | 0.8493        | 33.50        | 0.9440        | 4.45MB    | 506.25MB           |
|                    | SwinIR [13]  | 34.62        | 0.9289        | 30.54        | 0.8463        | 29.20        | 0.8082        | 28.66        | 0.8624        | 33.98        | 0.9478        | 47.58MB   | 50.31GB            |
|                    | HAT [6]      | 35.16        | 0.9335        | 31.33        | 0.8576        | 29.59        | 0.8177        | 30.70        | 0.8949        | 35.84        | 0.9567        | 83.09MB   | OOM                |
|                    | MambIR [9]   | 35.08        | 0.9323        | 30.99        | 0.8536        | 29.51        | 0.8157        | 29.93        | 0.8841        | 35.43        | 0.9546        | 18.61MB   | 64.00GB            |
| Local<br>(Classic) | Nearest      | 27.93        | 0.8123        | 26.00        | 0.7330        | 26.17        | 0.7065        | 23.34        | 0.6992        | 25.04        | 0.8157        | -         | 0.96MB             |
|                    | Bilinear     | 29.54        | 0.8504        | 26.96        | 0.7526        | 26.77        | 0.7177        | 23.99        | 0.7135        | 26.15        | 0.8372        | -         | 0.96MB             |
|                    | Bicubic [11] | 30.40        | 0.8678        | 27.55        | 0.7736        | 27.20        | 0.7379        | 24.45        | 0.7343        | 26.94        | 0.8554        | -         | 0.96MB             |
| Local<br>(DNNs)    | Baseline     | 33.64        | 0.9191        | 29.82        | 0.8321        | 28.68        | 0.7947        | 27.22        | 0.8308        | 32.16        | 0.9324        | 6.67MB    | 8.5+ 0MB           |
|                    | LineDL [10]  | 33.84        | 0.9217        | 29.99        | 0.8353        | 28.82        | 0.7981        | 27.46        | 0.8362        | 32.48        | 0.9359        | 27.45MB   | 75.0+60.0MB        |
|                    | Ours         | <b>33.92</b> | <b>0.9224</b> | <b>30.04</b> | <b>0.8367</b> | <b>28.85</b> | <b>0.7994</b> | <b>27.62</b> | <b>0.8410</b> | <b>32.69</b> | <b>0.9379</b> | 3.39MB    | 3.8+ 7.5MB         |

Table 5. Quantitative results (PSNR and SSIM) for super-resolution ( $\times 3$ ) on the standard benchmark datasets. Peak memory is reported in upscaling HD ( $1920 \times 1080$ ) resolution with a factor of 4, assuming FP32 precision.



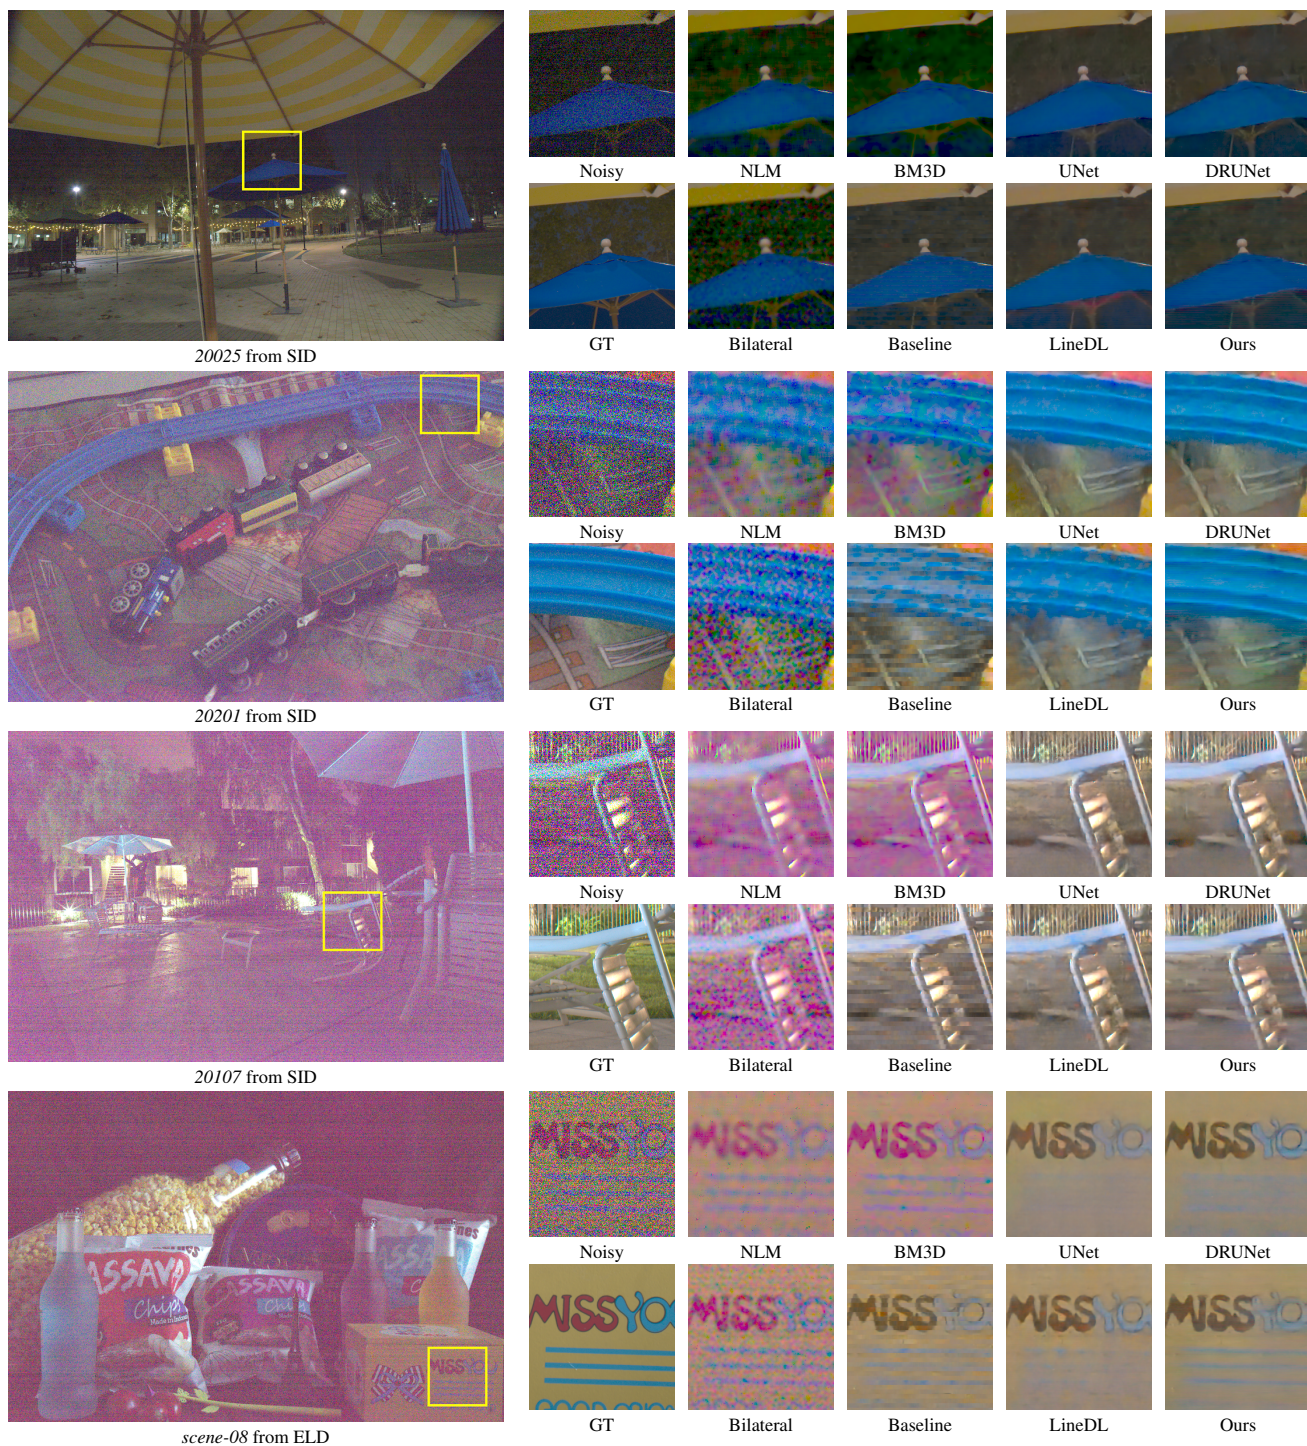

Figure 1. Additional qualitative results for RAW image denoising.

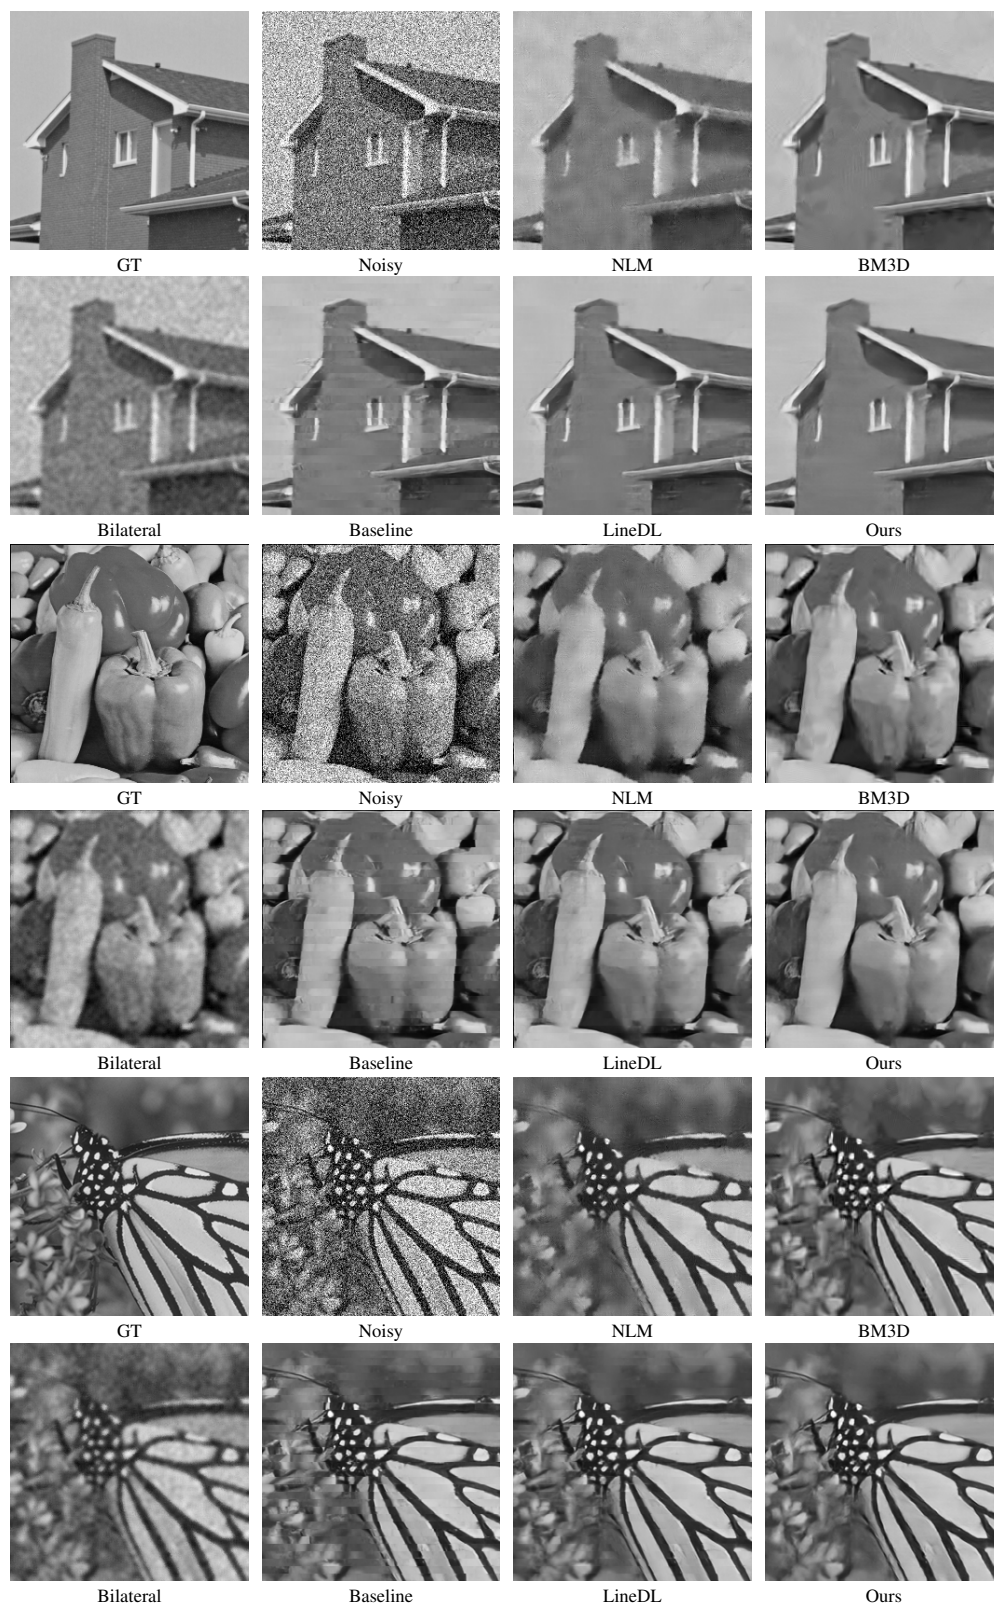

Figure 2. Qualitative results for Gaussian image denoising.



## References

- [1] Namhyuk Ahn, Byungkong Kang, and Kyung-Ah Sohn. Fast, accurate, and lightweight super-resolution with cascading residual network. In *ECCV*, 2018. [1](#), [4](#)
- [2] Jacob Benesty, Jingdong Chen, and Yiteng Huang. Study of the widely linear wiener filter for noise reduction. In *ICASSP*, 2010. [2](#), [3](#)
- [3] Antoni Buades, Bartomeu Coll, and Jean-Michel Morel. A non-local algorithm for image denoising. In *CVPR*, 2005. [2](#), [3](#)
- [4] Chen Chen, Qifeng Chen, Jia Xu, and Vladlen Koltun. Learning to see in the dark. In *CVPR*, 2018. [2](#), [3](#)
- [5] Liangyu Chen, Xiaojie Chu, Xiangyu Zhang, and Jian Sun. Simple baselines for image restoration. In *ECCV*, 2022. [2](#)
- [6] Xiangyu Chen, Xintao Wang, Jiantao Zhou, Yu Qiao, and Chao Dong. Activating more pixels in image super-resolution transformer. In *CVPR*, 2023. [3](#), [4](#)
- [7] Kostadin Dabov, Alessandro Foi, Vladimir Katkovnik, and Karen O. Egiazarian. Image denoising by sparse 3-d transform-domain collaborative filtering. *IEEE Trans. Image Process.*, 16(8):2080–2095, 2007. [2](#), [3](#)
- [8] Chao Dong, Chen Change Loy, and Xiaoou Tang. Accelerating the super-resolution convolutional neural network. In *ECCV*, 2016. [4](#)
- [9] Hang Guo, Jinmin Li, Tao Dai, Zhihao Ouyang, Xudong Ren, and Shu-Tao Xia. Mambair: A simple baseline for image restoration with state-space model. In *ECCV*, 2024. [4](#)
- [10] Yujie Huang, Wenshu Chen, Liyuan Peng, Yuhao Liu, Mingyu Wang, Xiao-Ping (Steven) Zhang, and Xiaoyang Zeng. Linedl: Processing images line-by-line with deep learning. *IEEE Trans. Image Process.*, 32:3150–3162, 2023. [1](#), [2](#), [3](#), [4](#)
- [11] R. Keys. Cubic convolution interpolation for digital image processing. *IEEE Transactions on Acoustics, Speech, and Signal Processing*, 29:1153–1160, 1981. [4](#)
- [12] Diederik P. Kingma and Jimmy Ba. Adam: A method for stochastic optimization. In *ICLR*, 2015. [1](#)
- [13] Jingyun Liang, Jiezhang Cao, Guolei Sun, Kai Zhang, Luc Van Gool, and Radu Timofte. Swinir: Image restoration using swin transformer. In *ICCV Workshops*, 2021. [3](#), [4](#)
- [14] Ilya Loshchilov and Frank Hutter. SGDR: stochastic gradient descent with warm restarts. In *ICLR*, 2017. [1](#)
- [15] Ioannis Pitas and Anastasios N Venetsanopoulos. *Nonlinear digital filters: principles and applications*. Springer Science & Business Media, 2013. [2](#), [3](#)
- [16] Carlo Tomasi and Roberto Manduchi. Bilateral filtering for gray and color images. In *ICCV*, 1998. [2](#), [3](#)
- [17] Zhou Wang, Alan C. Bovik, Hamid R. Sheikh, and Eero P. Simoncelli. Image quality assessment: from error visibility to structural similarity. *IEEE Trans. Image Process.*, 13(4):600–612, 2004. [1](#)
- [18] Kaixuan Wei, Ying Fu, Yinqiang Zheng, and Jiaolong Yang. Physics-based noise modeling for extreme low-light photography. *IEEE Trans. Pattern Anal. Mach. Intell.*, 44(11):8520–8537, 2022. [2](#)
- [19] Syed Waqas Zamir, Aditya Arora, Salman Khan, Munawar Hayat, Fahad Shahbaz Khan, and Ming-Hsuan Yang. Restormer: Efficient transformer for high-resolution image restoration. In *CVPR*, 2022. [2](#), [3](#)
- [20] Kai Zhang, Wangmeng Zuo, Yunjin Chen, Deyu Meng, and Lei Zhang. Beyond a gaussian denoiser: Residual learning of deep CNN for image denoising. *IEEE Trans. Image Process.*, 26(7):3142–3155, 2017. [1](#), [2](#), [3](#)
- [21] Kai Zhang, Yawei Li, Wangmeng Zuo, Lei Zhang, Luc Van Gool, and Radu Timofte. Plug-and-play image restoration with deep denoiser prior. *IEEE Trans. Pattern Anal. Mach. Intell.*, 44(10):6360–6376, 2022. [2](#)
- [22] Richard Zhang, Phillip Isola, Alexei A. Efros, Eli Shechtman, and Oliver Wang. The unreasonable effectiveness of deep features as a perceptual metric. In *CVPR*, 2018. [1](#)
